# Supplementary material
Source: Springer Nature journal article supplement (https://www.springermedizin.de/resource/supplementary/12885_2005_495_MOESM1_ESM.pdf/9469620)

### Complete Remission n=18

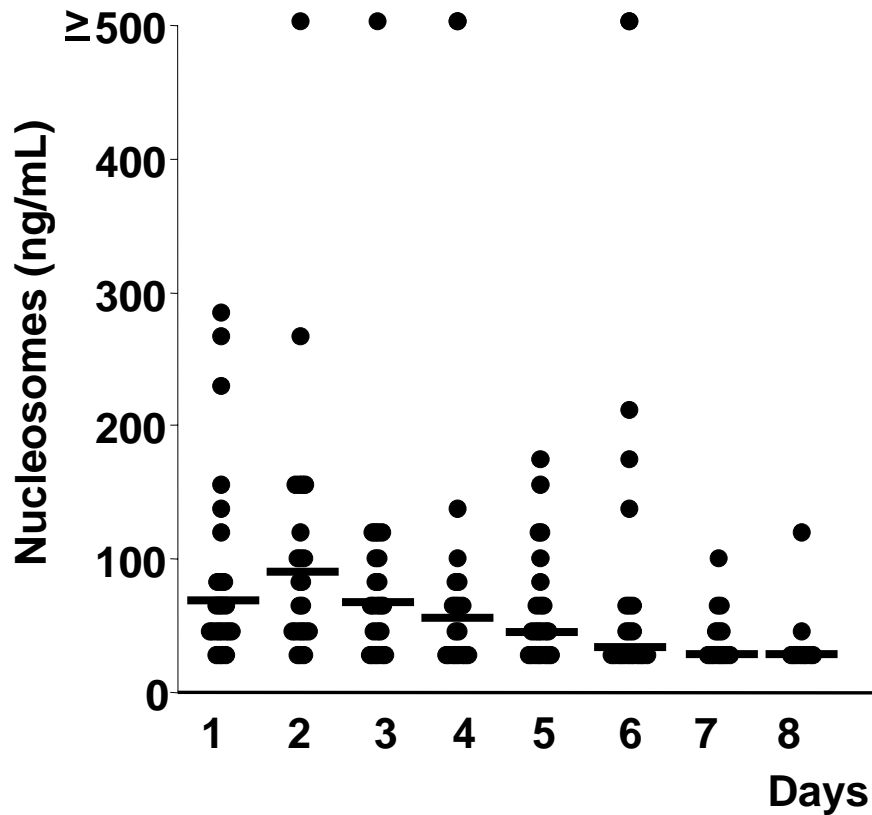

### No Remission n=7

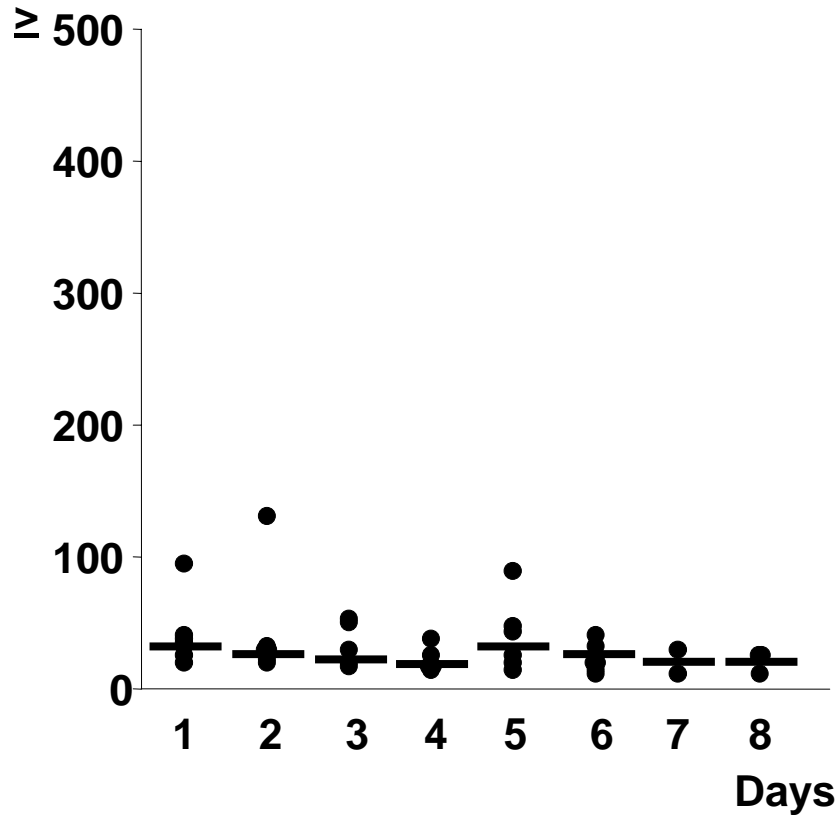

Supplement: MOESM1 [file 9469620]
